# Supplementary material for: Exploring and Engineering Novel Strong Promoters for High-Level Protein Expression in Bacillus subtilis DB104 through Transcriptome Analysis
Source: Microorganisms. 2023 Dec 6;11(12):2929. doi: 10.3390/microorganisms11122929 (PMC10745405; doi:10.3390/microorganisms11122929)
Supplement: Supplementary file 1 [file microorganisms-11-02929-s001.zip › Supplementary Table.xlsx]

## Sheet: Table S1
Table S1. Primers used in RT-qPCR
target		sequence
hag	F	CTGTAAATATTGAGGATATGGG
	R	CGAATTTTGTTACGTCAAGATC
sdpA	F	GGAAGAGTTCAGGCAATAGAAT
	R	TTTCTCTAAATTTGTGCAGGAG
sdpC	F	GCAGACCAACTTATCCAAAAA
	R	TATCCAGCTGCTACACAG
skfA	F	GGGAATCTGTGAGTAAAAAAGG
	R	CGTGTCATAGCAATACTCTT
spoIVA	F	GAGCCTAAATTTGTTCCGAATC
	R	GCACTGTGTAACCTACACAA
sspE	F	CAATCAGCTGCTGRTCAA
	R	AATTGACCTTGTTGTCCAGC
sspB	F	GCTCAGGCTATCGATCAAAT
	R	GATTTCTCCTCCGACAGAAC
cotX	F	TCTAGCTCAAGCAAATCTCA
	R	ACTGATGTTACGGCTTGAAC
cotY	F	GGGCGTAAAATAGACAGTGT
	R	GGAAACGTAGGGGGATTTGT
cotV	F	GCCTTTGTGACAACCATGAT
	R	GGGAGCTATCGAGAATAAGA
yczNM	F	ATGTCAGGATACTCTAACGG
	R	AACAAACGCAGTCCCTAC
cdd	F	GCTGTTTCTGAAGGGGATAC
	R	AGAAATCACCTGTCGGCA
rpsJ	F	ACAAATACAAAGATTCTCGTGAGC
	R	CTAATCGCATAAGAGCATCAACAG

## Sheet: Table S2
Table S2. TPM values of selected genes
Gene	Description	TPM*
		8 h	10 h	12 h	15 h	18 h	24 h	total
hag	flagellin protein	35370	5278	793	191	92	221	41944
sdpC	toxin, kills non-sporulating cells	15175	32303	13413	2336	980	6666	70873
skfA	sporulation killing factor A	3653	16990	37157	6531	2708	3054	70093
spoIVA	spore coat morphogenetic protein	9	7770	26126	5259	2172	2190	43525
sspE	small acid-soluble spore protein	140	382	17439	68242	10155	17838	114196
sspB	small acid-soluble spore protein	3	84	8082	35591	2720	4286	50766
cotX	spore coat protein	290	62	72	21516	75558	18170	115668
cotY	outer spore coat protein	8	78	236	21147	65667	10293	97429
yczN	putative spore and germination protein	590	673	851	685	11545	97628	111972
yczM	putative type I toxin	314	482	240	486	7142	49157	57820
*: Transcriptome raw data were deposited at NCBI SRA database under PRJNA934277.
Underline indicates the criteria by which each gene is selected.

## Sheet: Table S3
Table S2. Primers used for plasmid construction
Primer name	target	Primer sequence (5'-3')
P43-F	P43	CGACGCGTCGTGATAGGTGGTATGTTTTCG
P43-OR		TCCTCGCCCTTGCTCACCATGTGTACATTCCTCTCTTACC
P43-OF	eGFP for P43	GGTAAGAGAGGAATGTACACATGGTGAGCAAGGGCGAGGA
Phag-F	Phag	CGACGCGTCGCGTTATCCAGCGATGTGATC
Phag-OR		CCTTGCTCACCATTGTTTTGTTCCTCCCTG
Phag-OF	eGFP for Phag	GGGAGGAACAAAACAATGGTGAGCAAGGG
Psdp-F	Psdp	CGACGCGTCGTGCCGAAGCCGTAA
Psdp-OR		CGCCCTTGCTCACCATTACAGTAATAATTCCCTTTTTTTTGATGTA
Psdp-OF	eGFP for Psdp	AGGGAATTATTACTGTAATGGTGAGCAAGGGCG
PsdpC-F	PsdpC	CGACGCGTCTTGGGATAATATTCAGCATTGG
PsdpC-OR		CGCCCTTGCTCACCATATTATTATACCTCCATTAAGTTATTTCTC
PsdpC-OF	eGFP for PsdpC	CTTAATGGAGGTATAATAATATGGTGAGCAAGGGCG
PskfA-F	PskfA	CGACGCGTCGGATTGCAGCTGATTGCTTAC
PskfA-OR		CGCCCTTGCTCACCATAAGTAAACCTCCTCTC
PskfA-OF	eGFP for	GAGAGGAGGTTTACTTATGGTGAGCAAGGGCG
PspoIVA-1F	PspoIVA-1	CGACGCGTCGTAAATGACAAA
PspoIVA-1OR		CCCTTGCTCACCATGTGATCCCCT
PspoIVA-1OF	eGFP for PspoIVA-1	GGGAGGGGATCACATGGTGAGCAAG
PspoIVA-2F	PspoIVA-2	CGACGCGTCGTTTTATATTAATAGATTGAGGATGA
PspoIVA-2OR		CCCTTGCTCACCATGTGATCCCCT
PspoIVA-2OF	eGFP for PspoIVA-2	GGGAGGGGATCACATGGTGAGCAAG
PsspE-F	PsspE	CGACGCGTCGCCACGGTCGGTGTATCAAAAG
PsspE-OR		GCCCTTGCTCACCATTGTTATCACCTCCACGGTCATTAG
PsspE-OF	eGFP for PsspE	GTGGAGGTGATAACAATGGTGAGCAAGGGCG
PsspB-F	PsspB	CGACGCGTCGTATAAAGGGACCCATTATGAAGGCATC
PsspB-OR		GCCCTTGCTCACCATGTGTAAAATCTCCTTTTTATTTAGTATGGTTGG
PsspB-OF	eGFP for PsspB	GGAGATTTTACACATGGTGAGCAAGGGCG
PcotX-F	PcotX	CGACGCGTCGATTCTTAGTGAACTTG
PcotX-OR		CTCGCCCTTGCTCACCATATCTATTCCTCCTTTTC
PcotX-OF	eGFP for PcotX	GAAAAGGAGGAATAGATATGGTGAGCAAGGGCGAGG
PcotVWX-F	PcotVWX	CGACGCGTGCTATAATGCCGGCAAGGC
PcotXWX-OR		CTCGCCCTTGCTCACCATATCTATTCCTCCTTTTC
PcotXWX-OF	eGFP for PcotVWX	GAAAAGGAGGAATAGATATGGTGAGCAAGGGCGAGG
PcotYZ-F	PcotYZ	CGACGCGTCGGCAGAGCTAAAAACGCTCTGCTTTTTC
PcotYZ-OR		CTCCTCGCCCTTGCTCACCATTGATTTCAGCTCCTTCTTTATAGGGTATTTG
PcotYZ-OF	eGFP for PcotYZ	CTATAAAGAAGGAGCTGAAATCAATGGTGAGCAAGGGCGAG
Pycz-F	PyczNM	CGACGCGTCGGGTTGTAGGGGAAGCGATGC
Pycz-OR		CCTCGCCCTTGCTCACCATAAGGTTTCACCTCCCTATGAA
Pycz-OF	eGFP for PyczNM	TTCATAGGGAGGTGAAACCTTATGGTGAGCAAGGGCGAGG
eGFP-R	eGFP	ATGTTGTGTGGAATTGTGAGCG
Underlined indicates inserted MluⅠ site

## Sheet: Table S4
Table S4. Primers used for recombinant plasmid construction
Primer name	Primer sequence-(5'-3')	used for
sdp-OF1	AGCTTAGAGGAGGTTACTGTAATGGTGAGCAAGG	Psdp-1
sdp-OR1	GCTCACCATTACAGTAACCTCCTCTAAGCTAATATAATCATTTC
sdp-OF2	ATTATATTAGCTTTAAGGAGGTTACTGTAATGGTG	Psdp-2
sdp-OR2	CACCATTACAGTAACCTCCTTAAAGCTAATATAATC
sdp-F3	ATAAGAATGCGGCCGCTAAACTATTAATCCATTATAATTGAGTGTCTTGCGG	Psdp-3
sdp-R3	CCCAAGCTTGGGGCATTAGTTATTTCAACACTAGCTTC
sdp-OF4	CCAAATTCAATTCTGTCGAAACTTTTTTAAGTCCAATCC	Psdp-4
sdp-OR4	GGACTTAAAAAAGTTTCGACAGAATTGAATTTGGGAACT
sdp-OFa	AGCTTAGAGGAGGTAATCTACATGGTGAGCAAGGGCG	Psdp-a
sdp-ORa	CGCCCTTGCTCACCATGTAGATTACCTCCTCTAAGCT
sdp-OFb	CTGACTAGGTATTATATAATCTTTTTGAATTGATTATATTAGCTTT	Psdp-b
sdp-ORb	AAAGCTAATATAATCAATTCAAAAAGATTATATAATACCTAGTCAG
sdp-OFc	CCATTTTTTGTTGACAATTCTGACTAGCTATTATATAAT	Psdp-c
sdp-ORc	ATATAATAGCTAGTCAGAATTGTCAACAAAAAATGGA					.
sdp-OFd	TCGTGCCGAAGCTGTTGATTATTCTGACTAGCTAT	Psdp-d
sdp-ORd	CAGAATAATCAACAGCTTCGGCACGACG
skfA-OF1	TCTGGTATAATCGTATCGCATGGGAG	PskfA-1
skfA-OR1	CTCCCATGCGATACGATTATACCAGA
skfA-ter-F	NNNNNATAAGAATGCGGCCGCTAAACTATGAGAATAGGGAGTTGAGCG	PskfA-2 PskfA-3
skfA-ter-R	CCCAAGCTTGGGATAAAATCCCCCTTAAGAGAAAATAA
skfA-OFa	TCTATGCAAAAATTGTAAGGAGGTTTACTTATGGTGAG	PskfA-a
skfA-ORa	CTCACCATAAGTAAACCTCCTTACAATTTTTGCATAGA
skfA-OFb	ATTGCAATCTGATATTATCGTATCGCATGGG	PskfA-b
skfA-Orb	CCCATGCGATACGATAATATCAGATTGCAAT
skfA-OFc	ACTTCGACATTGTTGAAGATTTATGGTATTATCGTATCGCATGGGAGC	PskfA-c
skfA-ORc	ATACGATAATACCATAAATCTTCAACAATGTCGAAGTAAGGGGGATTTT
sdp-his-OR	GATGATGATGGCTGCTGCCCATTACAGTAACCTCCTTAAAGC	Psdp-hegf
sdp-his-OF	GCTTTAAGGAGGTTACTGTAATGGGCAGCAGCCATCATCATC
his-hegf-OR	CATTCTGAGTCTGAGTTCATGCTGCCGCGCGGCAC
his-hegf-OF	GTGCCGCGCGGCAGCATGAACTCAGACTCAGAATG
hegf-R	GTTTAGCGGCCGCTTATCTCAGTTCCCACCATTTCAGGTCTCT

## Sheet: Table S5
Table S5. Sequence of recombinant hegf gene
Name	Sequence (5'-3')	Length
hegf-F	TTTATGAACTCAGACTCAGAATGTCCGCTTTCACACGACGGATATTGTCTGCACGACGGAGTGTGTATGTATATTGAAGCGCTGGACAAATATGCGTGTAACTGTGTGGTGGGATATATTGGAGAAAGATGTCAATATAGAGACCTGAAATGGTGGGAACTGAGATAA	168 bp
hegf-R	TTATCTCAGTTCCCACCATTTCAGGTCTCTATATTGACATCTTTCTCCAATATATCCCACCACACAGTTACACGCATATTTGTCCAGCGCTTCAATATACATACACACTCCGTCGTGCAGACAATATCCGTCGTGTGAAAGCGGACATTCTGAGTCTGAGTTCATAAA	168 bp
